# Supplementary material
Source: publisher figshare collection journal article supplement (https://acs.figshare.com/ndownloader/files/4489915)
Supplement: Supplementary file 1 [file 4489915]

### Supporting Information:

Supporting Information Figure S1. SecA donor quenching and signal peptide acceptor enhancement. Fluorescence spectra of IAEDANS-labeled SecA-Cys-827 with unlabeled SP22 (—), IAEDANS-labeled SecA-Cys-827 and IANBD-labeled SP22 (—) and IANBD-labeled SP22 and SecA-Cys-827 (—). The SecA donor was at 7  $\mu$ M and the SP22 acceptor was at 18  $\mu$ M with excitation at 336 nm in all cases.

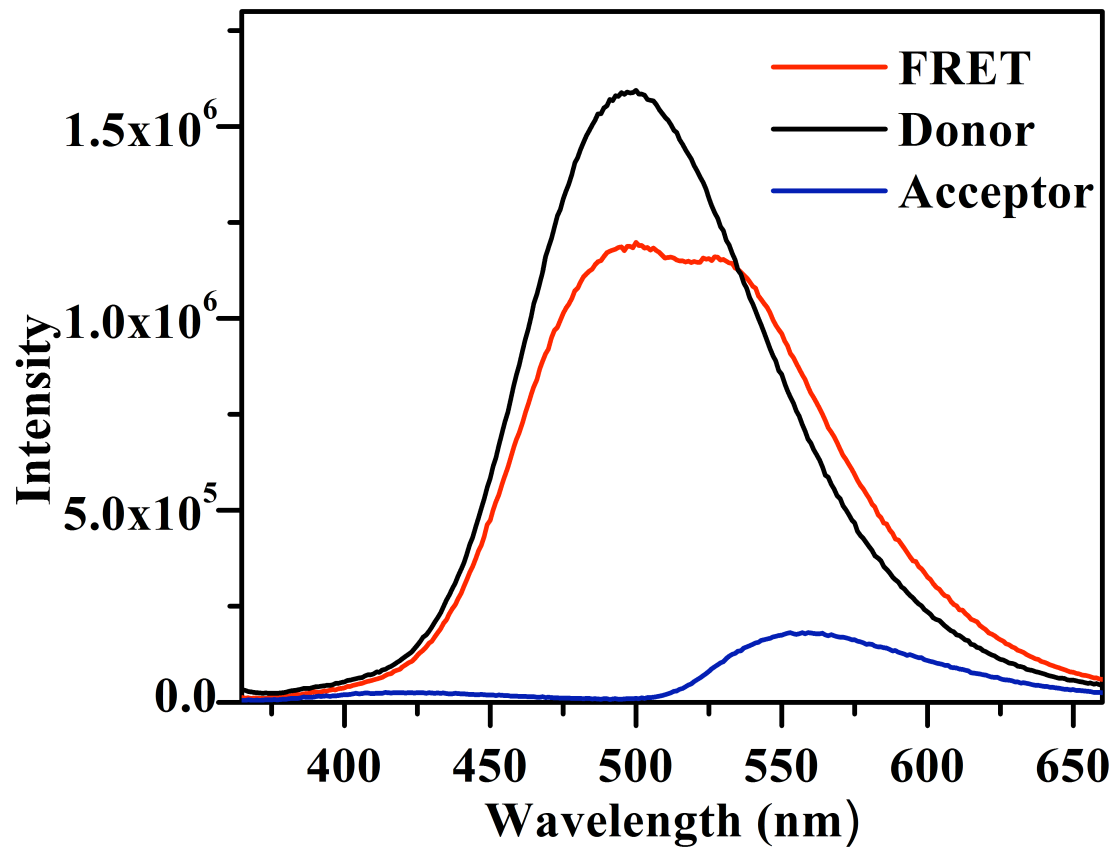

Supporting Information Figure S2. Binding affinity of unlabeled SP2 and IANBD-labeled-SP2 with IAEDANS-labeled SecA-Cys-256. (A) Binding of SP2 to SecA-256C-IAEDANS measured by change in fluorescence intensity upon signal peptide binding. The dissociation constant was determined to be  $1.2 \pm 0.1 \mu\text{M}$ . (B) Binding of SP2-IAEAD to SecA-256C-IAEDANS measured by energy transfer. The dissociation constant was found to be  $8.1 \pm 2.2 \mu\text{M}$ . SecA 256C-IAEDANS was maintained at a constant concentration of  $1 \mu\text{M}$  and SP2 (IANBD) was titrated into the system from 0-30  $\mu\text{M}$ . All experiments were performed in TKE buffer at  $20^\circ\text{C}$ .

Figure S2 (A)

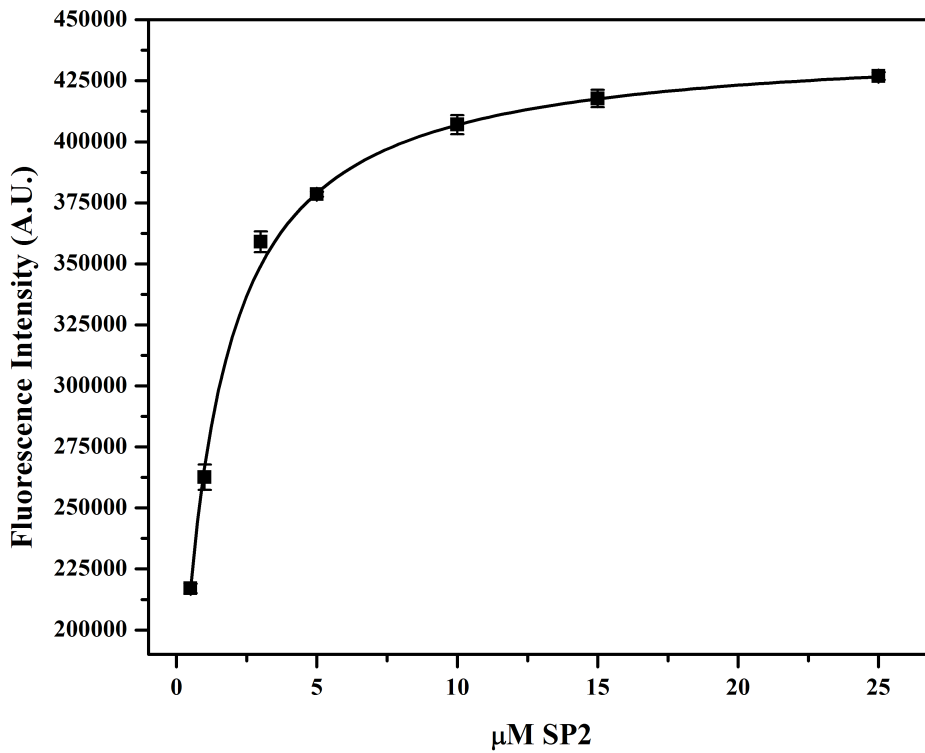

Figure S2 (B)

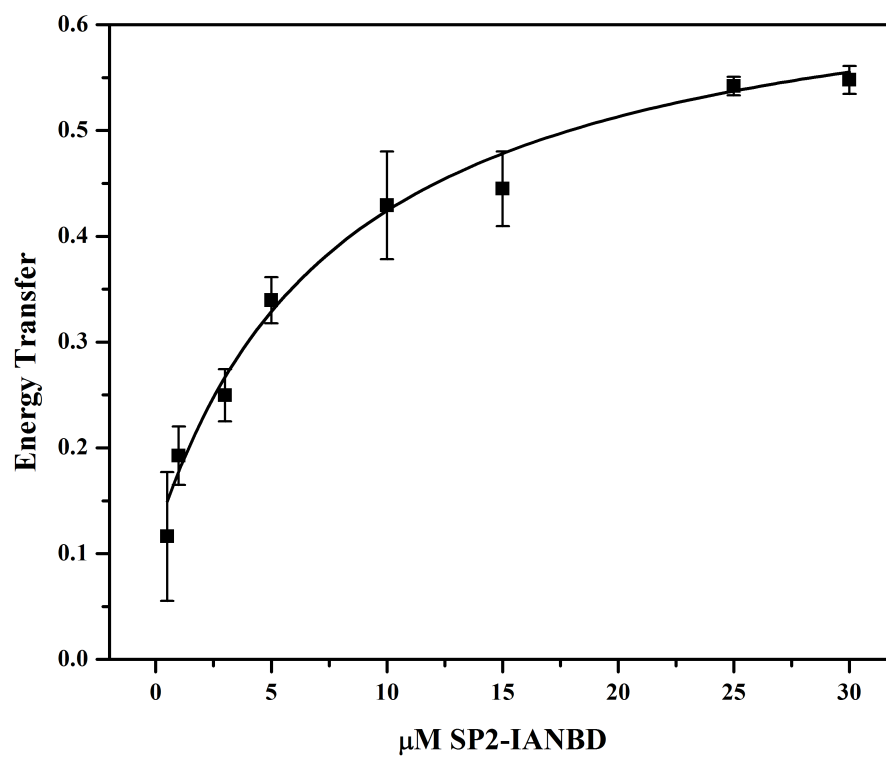

Supporting Information Figure S3. Mapped signal peptide binding site on various SecA crystal structures. The FRET-mapped binding site is colored in dark green on the SecA structure from (A) *Bacillus subtilis* (pdb code 1m6n) (1), (B) *Bacillus subtilis* (pdb code 2ibm) (2), (C) *Escherichia coli* (pdb code 2fsf) (3), (D) *Thermus thermophilus* (pdb code 2ipc) (4), and (E) *Mycobacterium tuberculosis* (pdb code inl3) (5). The *T. thermophilus* SecA structure is shown as a parallel dimer, all other structures are shown as monomers.

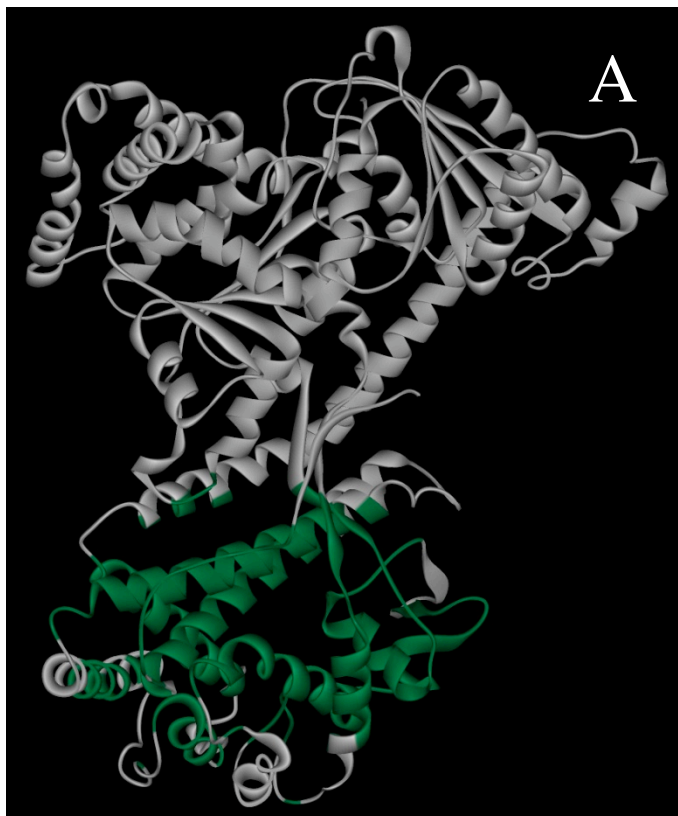

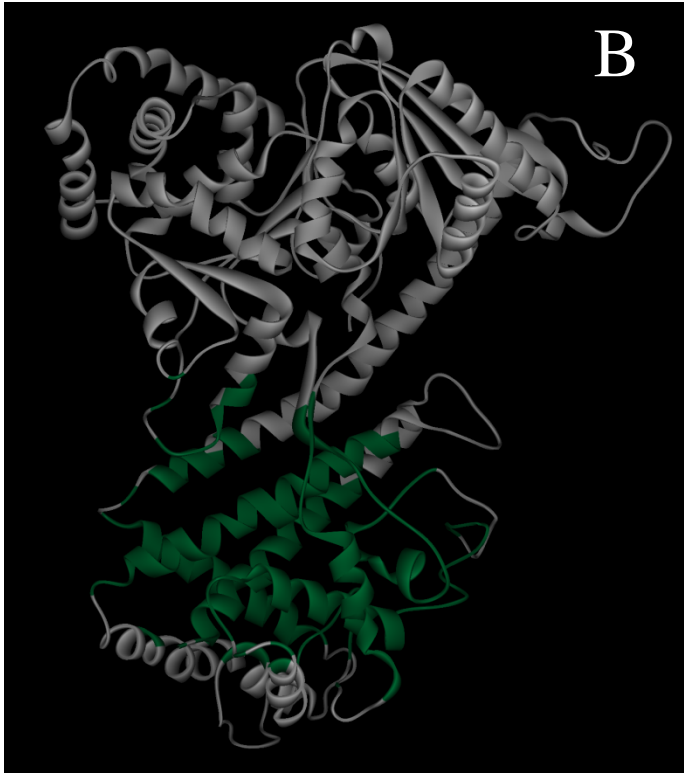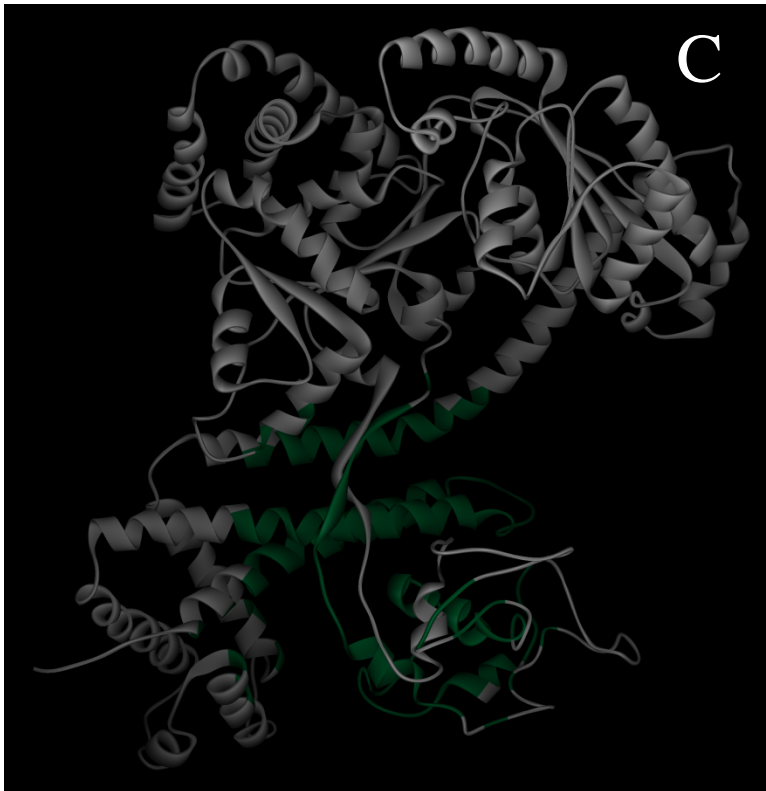

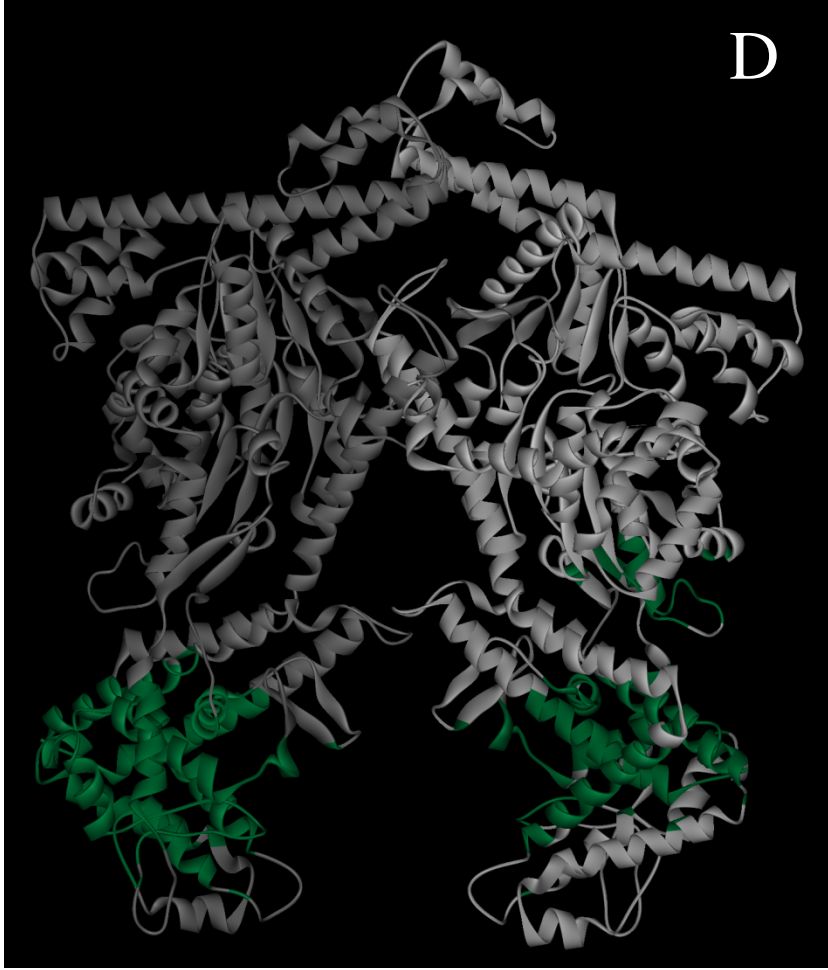

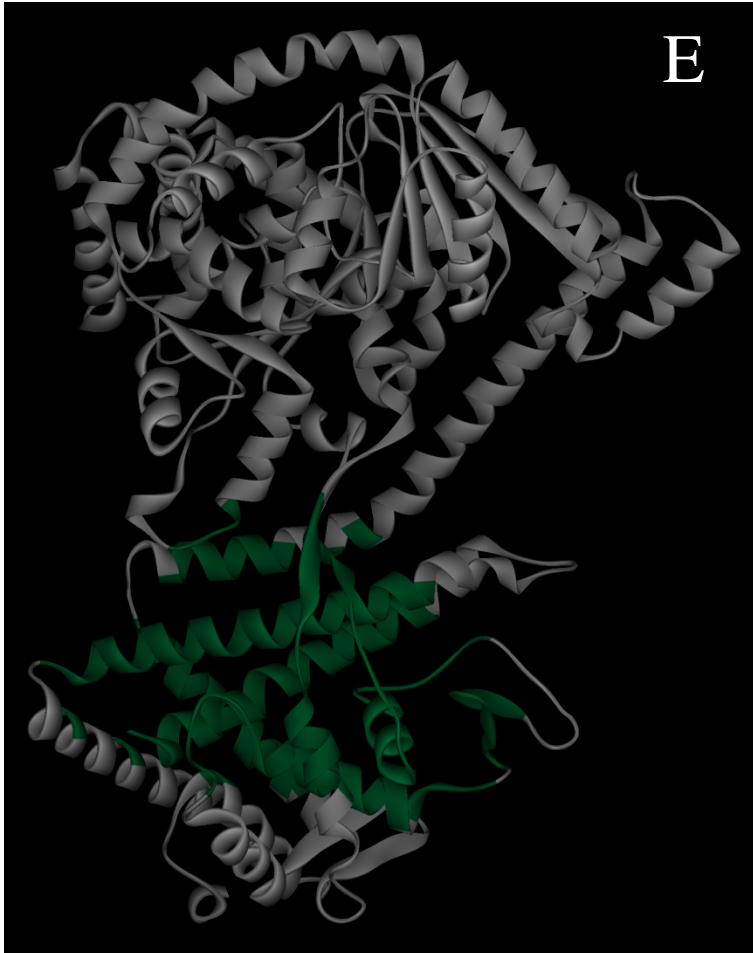

#### REFERENCES:

1. Hunt, J. F., Weinkauff, S., Henry, L., Fak, J. J., McNicholas, P., Oliver, D. B., and Deisenhofer, J. (2002) Nucleotide control of interdomain interactions in the conformational reaction cycle of SecA, *Science* 297, 2018-2026.
2. Zimmer, J., Li, W., and Rapoport, T. A. (2006) A novel dimer interface and conformational changes revealed by an X-ray structure of *B. subtilis* SecA, *J Mol Biol* 364, 259-265.
3. Papanikolau, Y., Papadovasilaki, M., Ravelli, R. B., McCarthy, A. A., Cusack, S., Economou, A., and Petratos, K. (2007) Structure of dimeric SecA, the *Escherichia coli* preprotein translocase motor, *J Mol Biol* 366, 1545-1557.
4. Vassilyev, D. G., Mori, H., Vassilyeva, M. N., Tsukazaki, T., Kimura, Y., Tahirov, T. H., and Ito, K. (2006) Crystal structure of the translocation ATPase SecA from *Thermus thermophilus* reveals a parallel, head-to-head dimer, *J Mol Biol* 364, 248-258.

5. Sharma, V., Arockiasamy, A., Ronning, D. R., Savva, C. G., Holzenburg, A., Braunstein, M., Jacobs, W. R., Jr., and Sacchettini, J. C. (2003) Crystal structure of *Mycobacterium tuberculosis* SecA, a preprotein translocating ATPase, *Proc Natl Acad Sci U S A* 100, 2243-2248.
